# Supplementary material
Source: MDPI journal article supplement (https://www.mdpi.com/2077-0472/6/2/22)
Supplement: s1 [file s1]

Supplementary Materials: Small Scale Farmers’ Indigenous Agricultural Adaptation Options in the Face of Declining or Stagnant Crop Yields in the Fako and Meme Divisions of Cameroon

Terence Epule Epule * and Christopher Robin Bryant

**Table S1.** Socioeconomic properties of the 200 respondents in all four study sites.

| **Variables** | **Study Site 1: Bonjungo Court Area** | **Study Site 1: Bonjungo Court Area** | **Study Site 2: Lower Muea** | **Study Site 2: Lower Muea** | **Study Site 3: Bole Bakundu** | **Study Site 3: Bole Bakundu** | **Study Site 4: Marumba One** | **Study Site 4: Marumba One** | **Total for all 4 Study Sites** | **Total for all 4 Study Sites** |
| --- | --- | --- | --- | --- | --- | --- | --- | --- | --- | --- |
| *Gender* | *Frequencies* | *Percentage* | *Frequencies* | *Percentage* | *Frequencies* | *Percentage* | *Frequencies* | *Percentage* | *Cummulative Frequencies* | *Total Percentage* |
| Male | 29 | 58 | 27 | 54 | 24 | 48 | 28 | 56 | 108 | 54 |
| Female | 21 | 42 | 23 | 46 | 26 | 52 | 22 | 44 | 92 | 46 |
| Total | 50 | 100 | 50 | 100 | 50 | 100 | 50 | 100 | 200 | 100 |
| *Age bracket (Years)* | | | | | | | | | | |
| <25 | 1 | 2 | 0 | 0 | 0 | 0 | 0 | 0 | 1 | 0.5 |
| 25–30 | 0 | 0 | 0 | 0 | 0 | 0 | 0 | 0 | 0 | 0 |
| 31–35 | 9 | 18 | 6 | 12 | 8 | 16 | 9 | 18 | 32 | 16 |
| 36–40 | 7 | 14 | 10 | 20 | 7 | 14 | 8 | 16 | 32 | 16 |
| 41–45 | 13 | 26 | 15 | 30 | 17 | 34 | 18 | 36 | 63 | 31.5 |
| 46–50 | 12 | 24 | 10 | 20 | 9 | 18 | 8 | 16 | 39 | 19.5 |
| 51–60 | 5 | 10 | 8 | 16 | 7 | 14 | 4 | 8 | 24 | 12 |
| >60 | 3 | 6 | 1 | 2 | 2 | 4 | 3 | 6 | 9 | 4.5 |
| Total | 50 | 100 | 50 | 100 | 50 | 100 | 50 | 100 | 200 | 100 |
| *Level of Education* | | | | | | | | | | |
| No Formal | 3 | 6 | 5 | 10 | 7 | 14 | 14 | 28 | 29 | 14.5 |
| Primary | 31 | 62 | 32 | 64 | 27 | 54 | 22 | 44 | 112 | 56 |
| Secondary | 6 | 12 | 5 | 10 | 8 | 16 | 7 | 14 | 26 | 13 |
| >Secondary | 10 | 20 | 8 | 16 | 8 | 16 | 7 | 14 | 33 | 16.5 |
| Total | 50 | 100 | 50 | 100 | 50 | 100 | 50 | 100 | 200 | 100 |
| *Number of years of farming Experience (Years)* | | | | | | | | | | |
| 5–10 | 10 | 20 | 8 | 16 | 8 | 16 | 6 | 12 | 32 | 16 |
| 11–15 | 10 | 20 | 9 | 18 | 7 | 14 | 8 | 16 | 34 | 17 |
| 16–20 | 0 | 0 | 0 | 0 | 4 | 8 | 5 | 10 | 9 | 4.5 |
| 21–25 | 20 | 40 | 2 | 4 | 13 | 26 | 12 | 24 | 47 | 23.5 |
| 26–30 | 10 | 20 | 12 | 24 | 12 | 24 | 12 | 24 | 46 | 23 |
| >31 | 0 | 0 | 19 | 38 | 6 | 12 | 7 | 14 | 32 | 16 |
| Total | 50 | 100 | 50 | 100 | 50 | 100 | 50 | 100 | 200 | 100 |
| *Annual Income level (FCFA)* | | | | | | | | | | |
| <240 K | 24 | 48 | 20 | 40 | 24 | 48 | 22 | 44 | 90 | 45 |
| 240k–480k | 7 | 14 | 11 | 22 | 7 | 14 | 6 | 12 | 31 | 15.5 |
| 481K–720K | 3 | 6 | 6 | 12 | 0 | 0 | 2 | 4 | 11 | 5.5 |
| 721K–960K | 3 | 6 | 3 | 6 | 3 | 6 | 5 | 10 | 14 | 7 |
| 972K–1.2M | 13 | 26 | 10 | 20 | 11 | 22 | 9 | 18 | 43 | 21.5 |
| >1.2M | 0 | 0 | 0 | 0 | 5 | 10 | 6 | 12 | 11 | 5.5 |
| Total | 50 | 100 | 50 | 100 | 50 | 100 | 50 | 100 | 200 | 100 |
| *Number of family members that live and work on the farm* | | | | | | | | | | |
| 1–2 | 2 | 4 | 5 | 10 | 0 | 0 | 15 | 30 | 22 | 11 |
| 3–5 | 33 | 66 | 26 | 52 | 30 | 60 | 19 | 38 | 108 | 54 |
| 6–8 | 15 | 30 | 16 | 32 | 14 | 28 | 9 | 18 | 54 | 27 |
| >8 | 0 | 0 | 3 | 6 | 6 | 12 | 7 | 14 | 16 | 8 |
| Total | 50 | 100 | 50 | 100 | 50 | 100 | 50 | 100 | 200 | 100 |

**Table 2.** Assessment of respondent’s perceptions of adaptation options.

| **Coping mechanisms** | **Bonjungo Court Area** | **Ranks** | **Lower Muea** | **Ranks** | **Bole Bakundu** | **Ranks** | **Marumba 1** | **Ranks** | **Total for all Four Sites** | **Percentages** | **Ranks** |
| --- | --- | --- | --- | --- | --- | --- | --- | --- | --- | --- | --- |
| *Problem solving adaptation mechanisms* | | | | | | | | | | | |
| Increase farm sizes | 50 | 1 | 42 | 1 | 50 | 1 | 50 | 1 | 192 | 21.6 | 1 |
| Relocate farm | 0 | 7.5 | 0 | 8.5 | 13 | 7 | 16 | 7 | 29 | 3.3 | 8 |
| Multiple farm plots | 30 | 2.5 | 27 | 3.5 | 24 | 6 | 29 | 6 | 110 | 12.4 | 5 |
| Labour inputs | 0 | 7.5 | 10 | 7 | 10 | 8.5 | 6 | 10 | 26 | 2.9 | 9 |
| Buying food | 0 | 7.5 | 0 | 8.5 | 0 | 10.5 | 5 | 11 | 5 | 0.6 | 11 |
| Early harvesting | 0 | 7.5 | 0 | 8.5 | 0 | 10.5 | 0 | 12.5 | 0 | 0 | 12.5 |
| Supplemental occupations | 30 | 2.5 | 27 | 3.5 | 34 | 4 | 39 | 3 | 130 | 14.6 | 3 |
| More hours of work | 0 | 7.5 | 0 | 8.5 | 49 | 2 | 42 | 2 | 91 | 10.2 | 6 |
| High yielding Varieties | 0 | 7.5 | 0 | 8.5 | 0 | 10.5 | 8 | 9 | 8 | 0.9 | 10 |
| Organic fertilizers | 30 | 2.5 | 24 | 5 | 30 | 5 | 32 | 5 | 116 | 13 | 4 |
| Inorganic fertilizers | 10 | 6 | 14 | 6 | 10 | 8.5 | 14 | 8 | 48 | 5.4 | 7 |
| Irrigation | 0 | 7.5 | 0 | 8.5 | 0 | 10.5 | 0 | 12.5 | 0 | 0 | 12.5 |
| Tractors | 0 | 7.5 | 0 | 8.5 | 0 | 10.5 | 0 | 12.5 | 0 | 0 | 12.5 |
| Help from relatives | 30 | 2.5 | 29 | 2 | 39 | 3 | 36 | 4 | 134 | 15.1 | 2 |
| *Social support adaptation mechanisms* | | | | | | | | | | | |
| Help from religious leaders | 0 | 7.5 | 0 | 8.5 | 0 | 10.5 | 0 | 12.5 | 0 | 0 | 12.5 |
| Help from tribal leaders | 0 | 7.5 | 0 | 8.5 | 0 | 10.5 | 0 | 12.5 | 0 | 0 | 12.5 |
| Help from government | 0 | 7.5 | 0 | 8.5 | 0 | 10.5 | 0 | 12.5 | 0 | 0 | 12.5 |
| Policy | 0 | 7.5 | 0 | 8.5 | 0 | 10.5 | 0 | 12.5 | 0 | 0 | 12.5 |

Where total number of frequencies (n) > 200 because of the possibility of multiple responses per question.
